# Supplementary material for: Mapping functional transcription factor networks from gene expression data
Source: HighWire-hosted journal article supplement (doi:10.1101/gr.150904.112), 2013-05-01
Supplement: Supp_Fig4.xlsx [file Supp_Fig4.xlsx]

## Sheet: CBF1
File Name: C:\Documents and Settings\apte\Desktop\Brent Lab\CBF1.7.27.12.rbx
Acquisition Date: 27-Jul-2012, 01:25 PM
Reader Serial Number: LX10007281403
RP1 PMT (Volts): 564.84
RP1 Target: 3595
Plate ID: 7.27.12 cbf1
Well	Type	Description	PHO81 (15)	PHO12 (22)	TFC1 (29)	PHO5 (36)	PDA1 (39)	CBF1 (47)	VTC3 (51)	PHO4 (53)	PHM6 (55)	UBC6 (56)	PHO89 (61)
A1	B		6.5	41	5	12	4	11	5	5	4	5	10		0
B1	B		6	43	4	10	4	5	7	6	4	2	8		0
C1	X1	cbf1 YPD	1520	6161.5	413	1803	9562	5	12697	702.5	477.5	3320	1135		2348.26
D1	X1	cbf1 YPD	1728.5	6550	467	1950	9504	4.5	14105	725	486.5	3324	1144		2443.5
E1	X2	CBF1 SC+10mM Pi	1228.5	2505	532	1044.5	8101	5	7116	1140.5	127	3395	3420.5		2437.7
F1	X2	CBF1 SC+10mM Pi	1161	2480	500	1011	7613	5	6653	1102.5	119	2969	3256		2236.09
G1	X3	CBF1 Y+SC+10mM Pi	1206	6683	528.5	1331.5	10620	16	8826	992	476	2934	539.5		2535.58
H1	X3	CBF1 Y+SC+10mM Pi	1117	5792	458	1175	9379	16	8098	894	403.5	2636	438		2236.86
A2	X4	CBF1 P+SC+10mM Pi	563	1432	368.5	617.5	8778	3	1814	654	46.5	2314	85		1946.86
B2	X4	CBF1 P+SC+10mM Pi	678	1337	371	779	9009	4	1980.5	654	47	2317.5	77		1969.28
C2	X5	CBF 1/2YPD+1/2SC +10mM Pi	1187	2260	642	397.5	11621	9	5930	1135	109	3864	3430		3057.78
D2	X5	CBF 1/2YPD+1/2SC +10mM Pi	1278	2284	550.5	363	11418	9.5	6016	1093	109	3858.5	3422		2885.48
E2	X6	CBF YP+SC=10mM Pi	992	3886	493.5	886	9817	17	6648	1005.5	258	2866	377		2394.89
F2	X6	CBF YP+SC=10mM Pi	932.5	3749	490	852	9356	18.5	6129	905	252	2734	370		2314.44
G2	X7	WT YPD	3098	10265	640	5099	9435	2110	16493	1433.5	537	4575	288.5		3014.7
H2	X7	WT YPD	3111	9823	592	4992	8970	2109.5	15967.5	1370	474.5	4375	278		2844.98
A3	X8	WT SC+10mM Pi	699.5	436	506.5	316.5	7229	1512	2696	1061	26	3095	2103		2238.22
B3	X8	WT SC+10mM Pi	672	469	533	363.5	7146	1517	2762	1085	28.5	3220.5	2212		2298.47
C3	X9	WT Y+SC+10mM Pi	460	246	376	352	5914	954.5	675	924	27	2644	21		1796.43
D3	X9	WT Y+SC+10mM Pi	418	213.5	356.5	360	5610	966	668	902.5	24	2401	23		1678.75
E3	X10	WT P+SC+10mM Pi	927.5	1592	833	526	15143	2314	3528	1731	79	5936	1154		4206.06
F3	X10	WT P+SC+10mM Pi	899.5	1631	684	550.5	14045	2342.5	3231	1722	69	5370.5	1166		3713.41
G3	X11	WT 1/2YPD+1/2SC +10mM Pi	7	56	8	51	5	9	9.5	7	6	8	13		2.50665
H3	X11	WT 1/2YPD+1/2SC +10mM Pi	2017.5	5760	604.5	2415	10494.5	1881.5	9226.5	1548	195	3937	133.5		2914.58
A4	X12	WT YP+SC=10mM Pi	1381.5	1921	491	975	8624	1215	5187	1182	94	3610	60		2473.01
B4	X12	WT YP+SC=10mM Pi	1345.5	2070	506	1004.5	8584	1312	5299	1203	105	3670	63		2508.05
			PHO81 (15)	PHO12 (22)	TFC1 (29)	PHO5 (36)	PDA1 (39)	CBF1 (47)	VTC3 (51)	PHO4 (53)	PHM6 (55)	UBC6 (56)	PHO89 (61)
		cbf1 YPD	0.644626	2.60597	0.173959	0.763118	4.07025	-0.00127754	5.40442	0.296815	0.201639	1.41232	0.479504
		cbf1 YPD	0.704828	2.66339	0.189277	0.793533	3.88786	-0.00143237	5.76999	0.294454	0.197462	1.35891	0.464497
		CBF1 SC+10mM Pi	0.501396	1.01038	0.216393	0.423966	3.32158	-0.00123067	2.91669	0.465604	0.0504575	1.39127	1.39948
		CBF1 SC+10mM Pi	0.516414	1.09029	0.221592	0.447209	3.40281	-0.00134163	2.9726	0.490588	0.051429	1.3262	1.45209
		CBF1 Y+SC+10mM Pi	0.473165	2.61912	0.206659	0.520787	4.18681	0.00315509	3.47849	0.389062	0.18615	1.15575	0.209222
		CBF1 Y+SC+10mM Pi	0.496566	2.57057	0.202739	0.520372	4.19114	0.00357644	3.61757	0.397208	0.178598	1.17687	0.191787
		CBF1 P+SC+10mM Pi	0.285973	0.71397	0.186968	0.311527	4.50674	-0.00256824	0.928674	0.3331	0.02183	1.18678	0.0390372
		CBF1 P+SC+10mM Pi	0.341115	0.657601	0.186109	0.389991	4.57274	-0.0020312	1.00265	0.329309	0.0218354	1.17505	0.0345304
		CBF 1/2YPD+1/2SC +10mM Pi	0.386146	0.725363	0.208485	0.126399	3.79916	0.000327035	1.93735	0.369386	0.0343387	1.26252	1.11879
		CBF 1/2YPD+1/2SC +10mM Pi	0.440741	0.776993	0.189223	0.12199	3.95567	0.000519844	2.08284	0.376887	0.0363891	1.336	1.18282
		CBF YP+SC=10mM Pi	0.411606	1.60508	0.204185	0.365361	4.09748	0.003758	2.77341	0.417556	0.106059	1.19525	0.153661
		CBF YP+SC=10mM Pi	0.400205	1.60169	0.20977	0.363371	4.04072	0.00453674	2.64557	0.388647	0.107154	1.17977	0.155977
		WT YPD	1.02556	3.39105	0.2108	1.68773	3.12834	0.69725	5.46887	0.473679	0.1768	1.5164	0.0927124
		WT YPD	1.09131	3.43799	0.206504	1.7508	3.15152	0.73867	5.61041	0.479617	0.165379	1.53657	0.0945526
		WT SC+10mM Pi	0.309732	0.176032	0.224285	0.136492	3.22801	0.671961	1.20185	0.471579	0.00982922	1.38123	0.935563
		WT SC+10mM Pi	0.289649	0.185776	0.229936	0.153363	3.10729	0.656524	1.19906	0.46966	0.0106593	1.39963	0.958464
		WT Y+SC+10mM Pi	0.252584	0.113558	0.206799	0.189821	3.28985	0.526878	0.372405	0.511291	0.0128032	1.46986	0.00667991
		WT Y+SC+10mM Pi	0.245272	0.10216	0.20968	0.207893	3.3394	0.570664	0.394342	0.534328	0.0119137	1.42815	0.00833956
		WT P+SC+10mM Pi	0.219029	0.368516	0.196978	0.122442	3.59933	0.548256	0.837363	0.410241	0.0178314	1.41046	0.272226
		WT P+SC+10mM Pi	0.240547	0.427908	0.182985	0.145284	3.78116	0.628667	0.868474	0.462243	0.0175041	1.4453	0.311573
		WT 1/2YPD+1/2SC +10mM Pi
		WT 1/2YPD+1/2SC +10mM Pi	0.690066	1.96186	0.205862	0.82482	3.59932	0.642803	3.16358	0.529236	0.0655327	1.3496	0.0427163
		WT YP+SC=10mM Pi	0.556104	0.759804	0.196724	0.389809	3.48564	0.48807	2.09502	0.475737	0.0363929	1.45835	0.0206227
		WT YP+SC=10mM Pi	0.53398	0.808595	0.199956	0.396124	3.42098	0.519925	2.1104	0.477462	0.0402703	1.46189	0.0215306
	PHO5		wt	cbf1			wt	cbf1
		YPD	1.68773	0.763118		YPD	0.473679	0.296815
		YPD	1.7508	0.793533		YPD	0.479617	0.294454
		SC+10mM Pi	0.136492	0.423966		SC+10mM Pi	0.471579	0.465604
		SC+10mM Pi	0.153363	0.447209		SC+10mM Pi	0.46966	0.490588
		Y+SC+10mM Pi	0.189821	0.520787		Y+SC+10mM Pi	0.511291	0.389062
		Y+SC+10mM Pi	0.207893	0.520372		Y+SC+10mM Pi	0.534328	0.397208
		P+SC+10mM Pi	0.122442	0.311527		P+SC+10mM Pi	0.410241	0.3331
		P+SC+10mM Pi	0.145284	0.389991		P+SC+10mM Pi	0.462243	0.329309
		1/2YPD+1/2SC +10mM Pi	NA	0.126399		1/2YPD+1/2SC +10mM Pi	NA	0.369386
		1/2YPD+1/2SC +10mM Pi	0.82482	0.12199		1/2YPD+1/2SC +10mM Pi	0.529236	0.376887
		YP+SC+10mM Pi	0.389809	0.365361		YP+SC=10mM Pi	0.475737	0.417556
		YP+SC+10mM Pi	0.396124	0.363371		YP+SC=10mM Pi	0.477462	0.388647
		YPD		SC+10mM Pi		1/2YPD+1/2SC +10mM Pi		Y+SC+10mM Pi		P+SC+10mM Pi	YP+SC+10mM Pi
Fig. 4A	cbf1Δ	0.778325	0.0215066	0.435587	0.0164351	0.124195	0.0031176	0.52058		0.350759	0.364366
	WT (CBF1)	1.71927	0.0445997	0.144928	0.0119295	0.82482	N/A	0.198857		0.133863	0.392966
	PHO11/12		wt	cbf1
		YPD	3.39105	2.60597
		YPD	3.43799	2.66339
		SC+10mM Pi	0.176032	1.01038
		SC+10mM Pi	0.185776	1.09029
		Y+SC+10mM Pi	0.113558	2.61912
		Y+SC+10mM Pi	0.10216	2.57057
		P+SC+10mM Pi	0.368516	0.71397
		P+SC+10mM Pi	0.427908	0.657601
		1/2YPD+1/2SC +10mM Pi	NA	0.725363
		1/2YPD+1/2SC +10mM Pi	1.96186	0.776993
		YP+SC+10mM Pi	0.759804	1.60508
		YP+SC+10mM Pi	0.808595	1.60169
		YPD	SC+10mM Pi	1/2YPD+1/2SC +10mM Pi	Y+SC+10mM Pi	P+SC+10mM Pi	YP+SC+10mM Pi
Fig. 4B	cbf1	2.63468	1.05034	0.751178	2.59484	0.685786	1.60339
	WT	3.41452	0.180904	1.96186	0.107859	0.398212	0.7842
	PHO89		wt	cbf1
		YPD	0.0927124	1.39948
		YPD	0.0945526	1.45209
		SC+10mM Pi	0.935563	0.209222
		SC+10mM Pi	0.958464	0.191787
		Y+SC+10mM Pi	0.00667991	0.0390372
		Y+SC+10mM Pi	0.00833956	0.0345304
		P+SC+10mM Pi	0.272226	1.11879
		P+SC+10mM Pi	0.311573	1.18282
		1/2YPD+1/2SC +10mM Pi	0	0.153661
		1/2YPD+1/2SC +10mM Pi	0.0427163	0.155977
		YP+SC=10mM Pi	0.0206227	0.0927124
		YP+SC=10mM Pi	0.0215306	0.0945526
