# Supplementary material for: Mapping functional transcription factor networks from gene expression data
Source: HighWire-hosted journal article supplement (doi:10.1101/gr.150904.112), 2013-05-01
Supplement: Supp_Fig5B.xlsx [file Supp_Fig5B.xlsx]

## Sheet: Outlier
File Name: C:\Documents and Settings\apte\Desktop\Brent Lab\2013.1.18 EDS1.rbx
Acquisition Date: 18-Jan-2013, 02:44 PM
Reader Serial Number: LX10007281403
Plate ID: EDS1 2013.1.18
RP1 PMT (Volts): 565.08
RP1 Target: 3595
			HXT3 (13)	ACCO2 (26)	[ TFC1 (29) ]	HXT2 (30)	HXT4 (33)	LYS9 (37)	LYS12 (38)	[ PDA1 (39) ]	CTP1 (42)	EDS1 (45)	GUSA (47)	LYS4 (48)	RGT1 (51)	HXT1 (53)	[ UBC6 (56) ]
Type	Well	Description	Outlier	Outlier	Outlier	Outlier	Outlier	Outlier	Outlier	Outlier	Outlier	Outlier	Outlier	Outlier	Outlier	Outlier	Outlier
B	A1,B1	Blank	0	0	0	0	0	0	0	0	0	0	0	0	0	0	0
X1	C1	BY4741-1 SC 2% glucose	0	0	0	0	0	0	0	0	0	0	0	0	0	0	0
X2	D1	BY4741-2 SC 2% glucose	0	0	0	0	0	0	0	0	0	0	0	0	0	0	0
X3	E1	Δeds1-1 (from KO collection) SC 2% glucose	0	0	0	0	0	0	0	0	0	0	0	0	0	0	0
X4	F1	Δeds1-2 (from KO collection) SC 2% glucose	0	0	0	0	0	0	0	0	0	0	0	0	0	0	0
X5	G1	MB425-1 (PtetO2) SC 2% glucose	0	0	0	0	0	0	0	0	0	0	0	0	0	0	0
X6	H1	MB425-2 (PtetO2) SC 2% glucose	0	0	0	0	0	0	0	0	0	0	0	0	0	0	0
X7	A2	MB426-1 (PtetO7) SC 2% glucose	0	0	0	0	0	0	0	0	0	0	0	0	0	0	0
X8	B2	MB426-2 (PtetO7) SC 2% glucose	0	0	0	0	0	0	0	0	0	0	0	0	0	0	0
X9	C2	MB431 (QKO Bio-rep 1) SC 2% glucose	0	0	0	0	0	0	0	0	0	0	0	0	0	0	0
X10	D2	MB432 (QKO Bio-rep 2) SC 2% glucose	0	0	0	0	0	0	0	0	0	0	0	0	0	0	0
X11	E2	MB425-1 (PtetO2) SC 2% glucose +0.1ug/ml Dox	0	0	0	0	0	0	0	0	0	0	0	0	0	0	0
X12	F2	MB425-2 (PtetO2) SC 2% glucose +0.1ug/ml Dox	0	0	0	0	0	0	0	0	0	0	0	0	0	0	0
X13	G2	BY4741 SC 2% galactose	0	0	0	0	0	0	0	0	0	0	0	0	0	0	0
X14	H2	Δeds1 (from KO collection) SC 2% galactose	0	0	0	0	0	0	0	0	0	0	0	0	0	0	0
X15	A3	MB425 (PtetO2) SC 2% galactose	0	0	0	0	0	0	0	0	0	0	0	0	0	0	0
X16	B3	MB426 (PtetO7) SC 2% galactose	0	0	0	0	0	0	0	0	0	0	0	0	0	0	0
X17	C3	MB431 (QKO) SC 2% galactose	0	0	0	0	0	0	0	0	0	0	0	0	0	0	0
X18	D3	MB425 (PtetO2) SC 2% galactose +0.1ug/ml Dox	0	0	0	0	0	0	0	0	0	0	0	0	0	0	0
X19	E3	MB426 (PtetO7) SC 2% galactose + 0.1ug/ml Dox	0	0	0	0	0	0	0	0	0	0	0	0	0	0	0
X20	F3	Beads only	0	0	0	0	0	0	0	0	0	0	0	0	0	0	0
X21	G3	Beads only	0	0	0	0	0	0	0	0	0	0	0	0	0	0	0
			HXT3 (13)	ACCO2 (26)	[ TFC1 (29) ]	HXT2 (30)	HXT4 (33)	LYS9 (37)	LYS12 (38)	[ PDA1 (39) ]	CTP1 (42)	EDS1 (45)	GUSA (47)	LYS4 (48)	RGT1 (51)	HXT1 (53)	[ UBC6 (56) ]
Type	Well	Description	Outlier	Outlier	Outlier	Outlier	Outlier	Outlier	Outlier	Outlier	Outlier	Outlier	Outlier	Outlier	Outlier	Outlier	Outlier
B	A1	Blank	0	0	0	0	0	0	0	0	0	0	0	0	0	0	0
B	B1	Blank	0	0	0	0	0	0	0	0	0	0	0	0	0	0	0
X1	C1	BY4741-1 SC 2% glucose	0	0	0	0	0	0	0	0	0	0	0	0	0	0	0
X2	D1	BY4741-2 SC 2% glucose	0	0	0	0	0	0	0	0	0	0	0	0	0	0	0
X3	E1	Δeds1-1 (from KO collection) SC 2% glucose	0	0	0	0	0	0	0	0	0	0	0	0	0	0	0
X4	F1	Δeds1-2 (from KO collection) SC 2% glucose	0	0	0	0	0	0	0	0	0	0	0	0	0	0	0
X5	G1	MB425-1 (PtetO2) SC 2% glucose	0	0	0	0	0	0	0	0	0	0	0	0	0	0	0
X6	H1	MB425-2 (PtetO2) SC 2% glucose	0	0	0	0	0	0	0	0	0	0	0	0	0	0	0
X7	A2	MB426-1 (PtetO7) SC 2% glucose	0	0	0	0	0	0	0	0	0	0	0	0	0	0	0
X8	B2	MB426-2 (PtetO7) SC 2% glucose	0	0	0	0	0	0	0	0	0	0	0	0	0	0	0
X9	C2	MB431 (QKO Bio-rep 1) SC 2% glucose	0	0	0	0	0	0	0	0	0	0	0	0	0	0	0
X10	D2	MB432 (QKO Bio-rep 2) SC 2% glucose	0	0	0	0	0	0	0	0	0	0	0	0	0	0	0
X11	E2	MB425-1 (PtetO2) SC 2% glucose +0.1ug/ml Dox	0	0	0	0	0	0	0	0	0	0	0	0	0	0	0
X12	F2	MB425-2 (PtetO2) SC 2% glucose +0.1ug/ml Dox	0	0	0	0	0	0	0	0	0	0	0	0	0	0	0
X13	G2	BY4741 SC 2% galactose	0	0	0	0	0	0	0	0	0	0	0	0	0	0	0
X14	H2	Δeds1 (from KO collection) SC 2% galactose	0	0	0	0	0	0	0	0	0	0	0	0	0	0	0
X15	A3	MB425 (PtetO2) SC 2% galactose	0	0	0	0	0	0	0	0	0	0	0	0	0	0	0
X16	B3	MB426 (PtetO7) SC 2% galactose	0	0	0	0	0	0	0	0	0	0	0	0	0	0	0
X17	C3	MB431 (QKO) SC 2% galactose	0	0	0	0	0	0	0	0	0	0	0	0	0	0	0
X18	D3	MB425 (PtetO2) SC 2% galactose +0.1ug/ml Dox	0	0	0	0	0	0	0	0	0	0	0	0	0	0	0
X19	E3	MB426 (PtetO7) SC 2% galactose + 0.1ug/ml Dox	0	0	0	0	0	0	0	0	0	0	0	0	0	0	0
X20	F3	Beads only	0	0	0	0	0	0	0	0	0	0	0	0	0	0	0
X21	G3	Beads only	0	0	0	0	0	0	0	0	0	0	0	0	0	0	0
Sampling Errors: 1 - Low bead #, 2 - Agg beads, 3 - Classify %, 4 - Region selection, 5 - Platform temperature
***Value not available / --- = Designated as an outlier
*Value extrapolated beyond standard range
OOR = Out of Range / OOR> = Out of Range Above / OOR< = Out of Range Below
Exp Conc = Expected Concentration / Obs Conc = Observed Concentration
Conc in Range = Unknown sample concentrations within range where standards recovery is 70-130%
Ratio = Member/Reference
Normalization Internal Control/Housekeeping Gene(s): TFC1 (29), PDA1 (39), and UBC6 (56)

## Sheet: FI
File Name: C:\Documents and Settings\apte\Desktop\Brent Lab\2013.1.18 EDS1.rbx
Acquisition Date: 18-Jan-2013, 02:44 PM
Reader Serial Number: LX10007281403
Plate ID: EDS1 2013.1.18
RP1 PMT (Volts): 565.08
RP1 Target: 3595
			HXT3 (13)	ACCO2 (26)	[ TFC1 (29) ]	HXT2 (30)	HXT4 (33)	LYS9 (37)	LYS12 (38)	[ PDA1 (39) ]	CTP1 (42)	EDS1 (45)	GUSA (47)	LYS4 (48)	RGT1 (51)	HXT1 (53)	[ UBC6 (56) ]
Type	Well	Description	FI	FI	FI	FI	FI	FI	FI	FI	FI	FI	FI	FI	FI	FI	FI
B	A1,B1	Blank	5.5	3.5	5	3	9.8	15	6	9.5	13.5	4	15.3	3	14.5	15	3
X1	C1	BY4741-1 SC 2% glucose	25153	2370	819	2472	24338	5888	10151	24971.5	1010	71	48.5	2798	2079.5	23397	8073
X2	D1	BY4741-2 SC 2% glucose	26064.5	2711	1037	3131.5	24716	6278	11903	24887	1117	105.5	42	3279	2314	23899	9599
X3	E1	Δeds1-1 (from KO collection) SC 2% glucose	21501	7634	736.5	5984	3436.5	19687	19931	24856.5	2562	18	62	8604	1708	19186.5	7800
X4	F1	Δeds1-2 (from KO collection) SC 2% glucose	21410	7126	698	5680.5	2817	18414.5	19944	24746	2331.5	8	48	8478	1435	18471	7611
X5	G1	MB425-1 (PtetO2) SC 2% glucose	23230.5	2871.5	771	1733	2943.5	6498	11082.5	24452	815	19255	45	3139	1644	20873	7180
X6	H1	MB425-2 (PtetO2) SC 2% glucose	25342	2607	1091	5011	25059	7807	14201	24645.5	1106	24348	70	2871	2736	24647.5	10366
X7	A2	MB426-1 (PtetO7) SC 2% glucose	24246.5	2581.5	1458	7214.5	24682.5	8509	14834.5	24917.5	1317	26091	68.5	3291	3256	5716	12817
X8	B2	MB426-2 (PtetO7) SC 2% glucose	24090	1907	1012	5889	24739	6444	11345	25030.5	1035	26986	40	2448	2467.5	4137.5	9593
X9	C2	MB431 (QKO Bio-rep 1) SC 2% glucose	25847	2065.5	460	24832	27116.5	4972	12707.5	20016.5	890	10	870	3822	33	1621	5659
X10	D2	MB432 (QKO Bio-rep 2) SC 2% glucose	26226	1367	817	24485	26640.5	2883	8040.5	24567	882	10	1014.5	2093	29	7839	8047
X11	E2	MB425-1 (PtetO2) SC 2% glucose +0.1ug/ml Dox	25376	2354.5	858	4473	22074.5	5434	10378	24721	829.5	1821	43	2749	1989	18709	6978
X12	F2	MB425-2 (PtetO2) SC 2% glucose +0.1ug/ml Dox	25119.5	2121.5	927	3807	24537	5288	10947.5	24544.5	937	11232.5	42	2402.5	2276	19681	8366
X13	G2	BY4741 SC 2% galactose	24382	2286	775.5	2246.5	18810	6003	10186.5	24469	790.5	68	37	3319.5	1908	24441	6579
X14	H2	Δeds1 (from KO collection) SC 2% galactose	24657	3946.5	461	5318	5019	13617	14325.5	24126	1635	6	46	5358	1218	18702	5654
X15	A3	MB425 (PtetO2) SC 2% galactose	25418	2694	1333	6644	25182	6733	14081.5	24630	1131.5	21734	64	3156	3439	24792.5	11090
X16	B3	MB426 (PtetO7) SC 2% galactose	24394	2050	1340	3854	24869	6406	12855	24862	1171.5	26506.5	57	2813.5	2929	5942.5	11958
X17	C3	MB431 (QKO) SC 2% galactose	25667.5	2215.5	562	24624	26464	5641	13418	24382	871	14	928	3903.5	37	4929	6876
X18	D3	MB425 (PtetO2) SC 2% galactose +0.1ug/ml Dox	24409	1909	802	4144	24373	4869.5	10487	24787	762.5	1720	55	2347	2080	21028	6844
X19	E3	MB426 (PtetO7) SC 2% galactose + 0.1ug/ml Dox	3	3	3	2	4	15.5	4	10	17	2	5	4	21	20	2
X20	F3	Beads only	4	5	6	7	8	7	7	6	7	5	5	9	7	9	5
X21	G3	Beads only	4	5	5	7	9	6	5.5	6	8	5	5	9	6	7	5
			HXT3 (13)	ACCO2 (26)	[ TFC1 (29) ]	HXT2 (30)	HXT4 (33)	LYS9 (37)	LYS12 (38)	[ PDA1 (39) ]	CTP1 (42)	EDS1 (45)	GUSA (47)	LYS4 (48)	RGT1 (51)	HXT1 (53)	[ UBC6 (56) ]
Type	Well	Description	FI	FI	FI	FI	FI	FI	FI	FI	FI	FI	FI	FI	FI	FI	FI
B	A1	Blank	5	4	5	3	13	15	7	10	15	4	15	3	14	16	4
B	B1	Blank	6	3	5	3	6.5	15	5	9	12	4	15.5	3	15	14	2
X1	C1	BY4741-1 SC 2% glucose	25153	2370	819	2472	24338	5888	10151	24971.5	1010	71	48.5	2798	2079.5	23397	8073
X2	D1	BY4741-2 SC 2% glucose	26064.5	2711	1037	3131.5	24716	6278	11903	24887	1117	105.5	42	3279	2314	23899	9599
X3	E1	Δeds1-1 (from KO collection) SC 2% glucose	21501	7634	736.5	5984	3436.5	19687	19931	24856.5	2562	18	62	8604	1708	19186.5	7800
X4	F1	Δeds1-2 (from KO collection) SC 2% glucose	21410	7126	698	5680.5	2817	18414.5	19944	24746	2331.5	8	48	8478	1435	18471	7611
X5	G1	MB425-1 (PtetO2) SC 2% glucose	23230.5	2871.5	771	1733	2943.5	6498	11082.5	24452	815	19255	45	3139	1644	20873	7180
X6	H1	MB425-2 (PtetO2) SC 2% glucose	25342	2607	1091	5011	25059	7807	14201	24645.5	1106	24348	70	2871	2736	24647.5	10366
X7	A2	MB426-1 (PtetO7) SC 2% glucose	24246.5	2581.5	1458	7214.5	24682.5	8509	14834.5	24917.5	1317	26091	68.5	3291	3256	5716	12817
X8	B2	MB426-2 (PtetO7) SC 2% glucose	24090	1907	1012	5889	24739	6444	11345	25030.5	1035	26986	40	2448	2467.5	4137.5	9593
X9	C2	MB431 (QKO Bio-rep 1) SC 2% glucose	25847	2065.5	460	24832	27116.5	4972	12707.5	20016.5	890	10	870	3822	33	1621	5659
X10	D2	MB432 (QKO Bio-rep 2) SC 2% glucose	26226	1367	817	24485	26640.5	2883	8040.5	24567	882	10	1014.5	2093	29	7839	8047
X11	E2	MB425-1 (PtetO2) SC 2% glucose +0.1ug/ml Dox	25376	2354.5	858	4473	22074.5	5434	10378	24721	829.5	1821	43	2749	1989	18709	6978
X12	F2	MB425-2 (PtetO2) SC 2% glucose +0.1ug/ml Dox	25119.5	2121.5	927	3807	24537	5288	10947.5	24544.5	937	11232.5	42	2402.5	2276	19681	8366
X13	G2	BY4741 SC 2% galactose	24382	2286	775.5	2246.5	18810	6003	10186.5	24469	790.5	68	37	3319.5	1908	24441	6579
X14	H2	Δeds1 (from KO collection) SC 2% galactose	24657	3946.5	461	5318	5019	13617	14325.5	24126	1635	6	46	5358	1218	18702	5654
X15	A3	MB425 (PtetO2) SC 2% galactose	25418	2694	1333	6644	25182	6733	14081.5	24630	1131.5	21734	64	3156	3439	24792.5	11090
X16	B3	MB426 (PtetO7) SC 2% galactose	24394	2050	1340	3854	24869	6406	12855	24862	1171.5	26506.5	57	2813.5	2929	5942.5	11958
X17	C3	MB431 (QKO) SC 2% galactose	25667.5	2215.5	562	24624	26464	5641	13418	24382	871	14	928	3903.5	37	4929	6876
X18	D3	MB425 (PtetO2) SC 2% galactose +0.1ug/ml Dox	24409	1909	802	4144	24373	4869.5	10487	24787	762.5	1720	55	2347	2080	21028	6844
X19	E3	MB426 (PtetO7) SC 2% galactose + 0.1ug/ml Dox	3	3	3	2	4	15.5	4	10	17	2	5	4	21	20	2
X20	F3	Beads only	4	5	6	7	8	7	7	6	7	5	5	9	7	9	5
X21	G3	Beads only	4	5	5	7	9	6	5.5	6	8	5	5	9	6	7	5
Sampling Errors: 1 - Low bead #, 2 - Agg beads, 3 - Classify %, 4 - Region selection, 5 - Platform temperature
***Value not available / --- = Designated as an outlier
*Value extrapolated beyond standard range
OOR = Out of Range / OOR> = Out of Range Above / OOR< = Out of Range Below
Exp Conc = Expected Concentration / Obs Conc = Observed Concentration
Conc in Range = Unknown sample concentrations within range where standards recovery is 70-130%
Ratio = Member/Reference
Normalization Internal Control/Housekeeping Gene(s): TFC1 (29), PDA1 (39), and UBC6 (56)

## Sheet: FI - Bkgd
File Name: C:\Documents and Settings\apte\Desktop\Brent Lab\2013.1.18 EDS1.rbx
Acquisition Date: 18-Jan-2013, 02:44 PM
Reader Serial Number: LX10007281403
Plate ID: EDS1 2013.1.18
RP1 PMT (Volts): 565.08
RP1 Target: 3595
			HXT3 (13)	ACCO2 (26)	[ TFC1 (29) ]	HXT2 (30)	HXT4 (33)	LYS9 (37)	LYS12 (38)	[ PDA1 (39) ]	CTP1 (42)	EDS1 (45)	GUSA (47)	LYS4 (48)	RGT1 (51)	HXT1 (53)	[ UBC6 (56) ]
Type	Well	Description	FI - Bkgd	FI - Bkgd	FI - Bkgd	FI - Bkgd	FI - Bkgd	FI - Bkgd	FI - Bkgd	FI - Bkgd	FI - Bkgd	FI - Bkgd	FI - Bkgd	FI - Bkgd	FI - Bkgd	FI - Bkgd	FI - Bkgd
B	A1,B1	Blank	5.5	3.5	5	3	9.8	15	6	9.5	13.5	4	15.3	3	14.5	15	3
X1	C1	BY4741-1 SC 2% glucose	25147.5	2366.5	814	2469	24328.3	5873	10145	24962	996.5	67	33.3	2795	2065	23382	8070
X2	D1	BY4741-2 SC 2% glucose	26059	2707.5	1032	3128.5	24706.3	6263	11897	24877.5	1103.5	101.5	26.8	3276	2299.5	23884	9596
X3	E1	Δeds1-1 (from KO collection) SC 2% glucose	21495.5	7630.5	731.5	5981	3426.8	19672	19925	24847	2548.5	14	46.8	8601	1693.5	19171.5	7797
X4	F1	Δeds1-2 (from KO collection) SC 2% glucose	21404.5	7122.5	693	5677.5	2807.3	18399.5	19938	24736.5	2318	4	32.8	8475	1420.5	18456	7608
X5	G1	MB425-1 (PtetO2) SC 2% glucose	23225	2868	766	1730	2933.8	6483	11076.5	24442.5	801.5	19251	29.8	3136	1629.5	20858	7177
X6	H1	MB425-2 (PtetO2) SC 2% glucose	25336.5	2603.5	1086	5008	25049.3	7792	14195	24636	1092.5	24344	54.8	2868	2721.5	24632.5	10363
X7	A2	MB426-1 (PtetO7) SC 2% glucose	24241	2578	1453	7211.5	24672.8	8494	14828.5	24908	1303.5	26087	53.3	3288	3241.5	5701	12814
X8	B2	MB426-2 (PtetO7) SC 2% glucose	24084.5	1903.5	1007	5886	24729.3	6429	11339	25021	1021.5	26982	24.8	2445	2453	4122.5	9590
X9	C2	MB431 (QKO Bio-rep 1) SC 2% glucose	25841.5	2062	455	24829	27106.8	4957	12701.5	20007	876.5	6	854.8	3819	18.5	1606	5656
X10	D2	MB432 (QKO Bio-rep 2) SC 2% glucose	26220.5	1363.5	812	24482	26630.8	2868	8034.5	24557.5	868.5	6	999.3	2090	14.5	7824	8044
X11	E2	MB425-1 (PtetO2) SC 2% glucose +0.1ug/ml Dox	25370.5	2351	853	4470	22064.8	5419	10372	24711.5	816	1817	27.8	2746	1974.5	18694	6975
X12	F2	MB425-2 (PtetO2) SC 2% glucose +0.1ug/ml Dox	25114	2118	922	3804	24527.3	5273	10941.5	24535	923.5	11228.5	26.8	2399.5	2261.5	19666	8363
X13	G2	BY4741 SC 2% galactose	24376.5	2282.5	770.5	2243.5	18800.3	5988	10180.5	24459.5	777	64	21.8	3316.5	1893.5	24426	6576
X14	H2	Δeds1 (from KO collection) SC 2% galactose	24651.5	3943	456	5315	5009.3	13602	14319.5	24116.5	1621.5	2	30.8	5355	1203.5	18687	5651
X15	A3	MB425 (PtetO2) SC 2% galactose	25412.5	2690.5	1328	6641	25172.3	6718	14075.5	24620.5	1118	21730	48.8	3153	3424.5	24777.5	11087
X16	B3	MB426 (PtetO7) SC 2% galactose	24388.5	2046.5	1335	3851	24859.3	6391	12849	24852.5	1158	26502.5	41.8	2810.5	2914.5	5927.5	11955
X17	C3	MB431 (QKO) SC 2% galactose	25662	2212	557	24621	26454.3	5626	13412	24372.5	857.5	10	912.8	3900.5	22.5	4914	6873
X18	D3	MB425 (PtetO2) SC 2% galactose +0.1ug/ml Dox	24403.5	1905.5	797	4141	24363.3	4854.5	10481	24777.5	749	1716	39.8	2344	2065.5	21013	6841
X19	E3	MB426 (PtetO7) SC 2% galactose + 0.1ug/ml Dox	-2.5	-0.5	-2	-1	-5.8	0.5	-2	0.5	3.5	-2	-10.3	1	6.5	5	-1
X20	F3	Beads only	-1.5	1.5	1	4	-1.8	-8	1	-3.5	-6.5	1	-10.3	6	-7.5	-6	2
X21	G3	Beads only	-1.5	1.5	0	4	-0.8	-9	-0.5	-3.5	-5.5	1	-10.3	6	-8.5	-8	2
			HXT3 (13)	ACCO2 (26)	[ TFC1 (29) ]	HXT2 (30)	HXT4 (33)	LYS9 (37)	LYS12 (38)	[ PDA1 (39) ]	CTP1 (42)	EDS1 (45)	GUSA (47)	LYS4 (48)	RGT1 (51)	HXT1 (53)	[ UBC6 (56) ]
Type	Well	Description	FI - Bkgd	FI - Bkgd	FI - Bkgd	FI - Bkgd	FI - Bkgd	FI - Bkgd	FI - Bkgd	FI - Bkgd	FI - Bkgd	FI - Bkgd	FI - Bkgd	FI - Bkgd	FI - Bkgd	FI - Bkgd	FI - Bkgd
B	A1	Blank	5	4	5	3	13	15	7	10	15	4	15	3	14	16	4
B	B1	Blank	6	3	5	3	6.5	15	5	9	12	4	15.5	3	15	14	2
X1	C1	BY4741-1 SC 2% glucose	25147.5	2366.5	814	2469	24328.3	5873	10145	24962	996.5	67	33.3	2795	2065	23382	8070
X2	D1	BY4741-2 SC 2% glucose	26059	2707.5	1032	3128.5	24706.3	6263	11897	24877.5	1103.5	101.5	26.8	3276	2299.5	23884	9596
X3	E1	Δeds1-1 (from KO collection) SC 2% glucose	21495.5	7630.5	731.5	5981	3426.8	19672	19925	24847	2548.5	14	46.8	8601	1693.5	19171.5	7797
X4	F1	Δeds1-2 (from KO collection) SC 2% glucose	21404.5	7122.5	693	5677.5	2807.3	18399.5	19938	24736.5	2318	4	32.8	8475	1420.5	18456	7608
X5	G1	MB425-1 (PtetO2) SC 2% glucose	23225	2868	766	1730	2933.8	6483	11076.5	24442.5	801.5	19251	29.8	3136	1629.5	20858	7177
X6	H1	MB425-2 (PtetO2) SC 2% glucose	25336.5	2603.5	1086	5008	25049.3	7792	14195	24636	1092.5	24344	54.8	2868	2721.5	24632.5	10363
X7	A2	MB426-1 (PtetO7) SC 2% glucose	24241	2578	1453	7211.5	24672.8	8494	14828.5	24908	1303.5	26087	53.3	3288	3241.5	5701	12814
X8	B2	MB426-2 (PtetO7) SC 2% glucose	24084.5	1903.5	1007	5886	24729.3	6429	11339	25021	1021.5	26982	24.8	2445	2453	4122.5	9590
X9	C2	MB431 (QKO Bio-rep 1) SC 2% glucose	25841.5	2062	455	24829	27106.8	4957	12701.5	20007	876.5	6	854.8	3819	18.5	1606	5656
X10	D2	MB432 (QKO Bio-rep 2) SC 2% glucose	26220.5	1363.5	812	24482	26630.8	2868	8034.5	24557.5	868.5	6	999.3	2090	14.5	7824	8044
X11	E2	MB425-1 (PtetO2) SC 2% glucose +0.1ug/ml Dox	25370.5	2351	853	4470	22064.8	5419	10372	24711.5	816	1817	27.8	2746	1974.5	18694	6975
X12	F2	MB425-2 (PtetO2) SC 2% glucose +0.1ug/ml Dox	25114	2118	922	3804	24527.3	5273	10941.5	24535	923.5	11228.5	26.8	2399.5	2261.5	19666	8363
X13	G2	BY4741 SC 2% galactose	24376.5	2282.5	770.5	2243.5	18800.3	5988	10180.5	24459.5	777	64	21.8	3316.5	1893.5	24426	6576
X14	H2	Δeds1 (from KO collection) SC 2% galactose	24651.5	3943	456	5315	5009.3	13602	14319.5	24116.5	1621.5	2	30.8	5355	1203.5	18687	5651
X15	A3	MB425 (PtetO2) SC 2% galactose	25412.5	2690.5	1328	6641	25172.3	6718	14075.5	24620.5	1118	21730	48.8	3153	3424.5	24777.5	11087
X16	B3	MB426 (PtetO7) SC 2% galactose	24388.5	2046.5	1335	3851	24859.3	6391	12849	24852.5	1158	26502.5	41.8	2810.5	2914.5	5927.5	11955
X17	C3	MB431 (QKO) SC 2% galactose	25662	2212	557	24621	26454.3	5626	13412	24372.5	857.5	10	912.8	3900.5	22.5	4914	6873
X18	D3	MB425 (PtetO2) SC 2% galactose +0.1ug/ml Dox	24403.5	1905.5	797	4141	24363.3	4854.5	10481	24777.5	749	1716	39.8	2344	2065.5	21013	6841
X19	E3	MB426 (PtetO7) SC 2% galactose + 0.1ug/ml Dox	-2.5	-0.5	-2	-1	-5.8	0.5	-2	0.5	3.5	-2	-10.3	1	6.5	5	-1
X20	F3	Beads only	-1.5	1.5	1	4	-1.8	-8	1	-3.5	-6.5	1	-10.3	6	-7.5	-6	2
X21	G3	Beads only	-1.5	1.5	0	4	-0.8	-9	-0.5	-3.5	-5.5	1	-10.3	6	-8.5	-8	2
Sampling Errors: 1 - Low bead #, 2 - Agg beads, 3 - Classify %, 4 - Region selection, 5 - Platform temperature
***Value not available / --- = Designated as an outlier
*Value extrapolated beyond standard range
OOR = Out of Range / OOR> = Out of Range Above / OOR< = Out of Range Below
Exp Conc = Expected Concentration / Obs Conc = Observed Concentration
Conc in Range = Unknown sample concentrations within range where standards recovery is 70-130%
Ratio = Member/Reference
Normalization Internal Control/Housekeeping Gene(s): TFC1 (29), PDA1 (39), and UBC6 (56)

## Sheet: Norm Ratio Chart
File Name: C:\Documents and Settings\apte\Desktop\Brent Lab\2013.1.18 EDS1.rbx
Acquisition Date: 18-Jan-2013, 02:44 PM
Reader Serial Number: LX10007281403
Plate ID: EDS1 2013.1.18
RP1 PMT (Volts): 565.08
RP1 Target: 3595
			EDS1 (45)	CTP1 (42)	ACCO2 (26)	LYS4 (48)	LYS12 (38)	LYS9 (37)	GUSA (47)	RGT1 (51)	HXT1 (53)	HXT2 (30)	HXT4 (33)	HXT3 (13)	[ UBC6 (56) ]	[ TFC1 (29) ]	[ PDA1 (39) ]
Type	Well	Description	Norm Ratio	Norm Ratio	Norm Ratio	Norm Ratio	Norm Ratio	Norm Ratio	Norm Ratio	Norm Ratio	Norm Ratio	Norm Ratio	Norm Ratio	Norm Ratio	Norm Ratio	Norm Ratio	Norm Ratio
X1	C1	BY4741-1 SC 2% glucose	0.012	0.182	0.432	0.511	1.854	1.073	0.006	0.377	4.272	0.451	4.445	4.594	1.474	0.149	4.561
X2	D1	BY4741-2 SC 2% glucose	0.016	0.176	0.432	0.523	1.898	0.999	0.004	0.367	3.81	0.499	3.941	4.157	1.531	0.165	3.968
X3	E1	Δeds1-1 (from KO collection) SC 2% glucose	0.003	0.489	1.464	1.65	3.822	3.773	0.009	0.325	3.677	1.147	0.657	4.123	1.496	0.14	4.766
X4	F1	Δeds1-2 (from KO collection) SC 2% glucose	0.001	0.457	1.404	1.671	3.932	3.628	0.006	0.28	3.639	1.12	0.554	4.221	1.5	0.137	4.878
X5	G1	MB425-1 (PtetO2) SC 2% glucose	3.758	0.156	0.56	0.612	2.163	1.266	0.006	0.318	4.072	0.338	0.573	4.534	1.401	0.15	4.772
X6	H1	MB425-2 (PtetO2) SC 2% glucose	3.733	0.168	0.399	0.44	2.177	1.195	0.008	0.417	3.778	0.768	3.841	3.886	1.589	0.167	3.778
X7	A2	MB426-1 (PtetO7) SC 2% glucose	3.37	0.168	0.333	0.425	1.916	1.097	0.007	0.419	0.737	0.932	3.188	3.132	1.655	0.188	3.218
X8	B2	MB426-2 (PtetO7) SC 2% glucose	4.332	0.164	0.306	0.393	1.82	1.032	0.004	0.394	0.662	0.945	3.97	3.867	1.54	0.162	4.017
X9	C2	MB431 (QKO Bio-rep 1) SC 2% glucose	0.002	0.236	0.554	1.027	3.414	1.332	0.23	0.005	0.432	6.674	7.286	6.946	1.52	0.122	5.378
X10	D2	MB432 (QKO Bio-rep 2) SC 2% glucose	0.001	0.16	0.251	0.385	1.479	0.528	0.184	0.003	1.44	4.506	4.901	4.826	1.48	0.149	4.52
X11	E2	MB425-1 (PtetO2) SC 2% glucose +0.1ug/ml Dox	0.344	0.155	0.445	0.52	1.965	1.027	0.005	0.374	3.542	0.847	4.181	4.807	1.322	0.162	4.682
X12	F2	MB425-2 (PtetO7) SC 2% glucose +0.1ug/ml Dox	1.956	0.161	0.369	0.418	1.906	0.919	0.005	0.394	3.426	0.663	4.273	4.375	1.457	0.161	4.274
X13	G2	BY4741 SC 2% galactose	0.013	0.156	0.458	0.665	2.042	1.201	0.004	0.38	4.899	0.45	3.771	4.889	1.319	0.155	4.906
X14	H2	Δeds1 (from KO collection) SC 2% galactose	0.001	0.409	0.995	1.352	3.615	3.434	0.008	0.304	4.718	1.342	1.265	6.224	1.427	0.115	6.089
X15	A3	MB425 (PtetO2) SC 2% galactose	3.048	0.157	0.377	0.442	1.974	0.942	0.007	0.48	3.475	0.931	3.53	3.564	1.555	0.186	3.453
X16	B3	MB426 (PtetO7) SC 2% galactose	3.607	0.158	0.279	0.383	1.749	0.87	0.006	0.397	0.807	0.524	3.383	3.319	1.627	0.182	3.382
X17	C3	MB431 (QKO) SC 2% galactose	0.002	0.189	0.488	0.86	2.957	1.24	0.201	0.005	1.083	5.428	5.833	5.658	1.515	0.123	5.374
X18	D3	MB425 (PtetO2) SC 2% galactose +0.1ug/ml Dox	0.334	0.146	0.371	0.457	2.043	0.946	0.008	0.403	4.095	0.807	4.748	4.756	1.333	0.155	4.829
X19	E3	MB426 (PtetO7) SC 2% galactose + 0.1ug/ml Dox	---	2.646	---	1.414	---	1	---	3.606	3.162	---	---	---	---	---	1
			Ratios to Mean of BY471
		Mean of BY4741-1	0.014	0.179	0.432	0.517	1.876	1.036	0.005	0.372	4.041	0.475	4.193	4.3755	1.5025	0.157	4.2645
			EDS1	CTP1	ACCO2	LYS4	LYS12	LYS9
Fig. 5B data		Δeds1 rep. 1	-2.22239	1.44987	1.76081	1.67423	1.02667	1.86469	0.847997	-0.194863	-0.136183	1.27187	-2.67402	-0.0857534	-0.00625482	-0.165338	0.160402
		Δeds1 rep. 2	-3.80735	1.35223	1.70044	1.69248	1.0676	1.80815	0.263034	-0.409876	-0.15117	1.2375	-2.92002	-0.0518631	-0.00240249	-0.196589	0.193913
		PtetO2-EDS1 rep. 1	8.06839	-0.198414	0.374396	0.243367	0.205374	0.289253	0.263034	-0.226276	0.0110252	-0.490904	-2.87138	0.0513365	-0.100908	-0.0658021	0.162217
		PtetO2-EDS1 rep. 2	8.05876	-0.0914984	-0.114643	-0.232661	0.214682	0.205987	0.678072	0.164745	-0.0970896	0.693179	-0.126501	-0.171162	0.0807541	0.0890835	-0.174754
			Mean expression levels
		WT	0.014	0.179	0.432	0.517	1.876	1.036	0.005	0.372	4.041	0.475	4.193	4.3755	1.5025	0.157	4.2645
		eds1Δ	0.002	0.473	1.434	1.6605	3.877	3.7005	0.0075	0.3025	3.658	1.1335	0.6055	4.172	1.498	0.1385	4.822
		eds1Δ:PtetO2-EDS1	3.7455	0.162	0.4795	0.526	2.17	1.2305	0.007	0.3675	3.925	0.553	2.207	4.21	1.495	0.1585	4.275

## Sheet: Std Dev
File Name: C:\Documents and Settings\apte\Desktop\Brent Lab\2013.1.18 EDS1.rbx
Acquisition Date: 18-Jan-2013, 02:44 PM
Reader Serial Number: LX10007281403
Plate ID: EDS1 2013.1.18
RP1 PMT (Volts): 565.08
RP1 Target: 3595
			HXT3 (13)	ACCO2 (26)	[ TFC1 (29) ]	HXT2 (30)	HXT4 (33)	LYS9 (37)	LYS12 (38)	[ PDA1 (39) ]	CTP1 (42)	EDS1 (45)	GUSA (47)	LYS4 (48)	RGT1 (51)	HXT1 (53)	[ UBC6 (56) ]
Type	Well	Description	Std Dev	Std Dev	Std Dev	Std Dev	Std Dev	Std Dev	Std Dev	Std Dev	Std Dev	Std Dev	Std Dev	Std Dev	Std Dev	Std Dev	Std Dev
B	A1,B1		0.71	0.71	0	0	4.6	0	1.41	0.71	2.12	0	0.35	0	0.71	1.41	1.41
X1	C1	1	0	0	0	0	0	0	0	0	0	0	0	0	0	0	0
X2	D1	2	0	0	0	0	0	0	0	0	0	0	0	0	0	0	0
X3	E1	3	0	0	0	0	0	0	0	0	0	0	0	0	0	0	0
X4	F1	4	0	0	0	0	0	0	0	0	0	0	0	0	0	0	0
X5	G1	5	0	0	0	0	0	0	0	0	0	0	0	0	0	0	0
X6	H1	6	0	0	0	0	0	0	0	0	0	0	0	0	0	0	0
X7	A2	7	0	0	0	0	0	0	0	0	0	0	0	0	0	0	0
X8	B2	8	0	0	0	0	0	0	0	0	0	0	0	0	0	0	0
X9	C2	9	0	0	0	0	0	0	0	0	0	0	0	0	0	0	0
X10	D2	10	0	0	0	0	0	0	0	0	0	0	0	0	0	0	0
X11	E2	11	0	0	0	0	0	0	0	0	0	0	0	0	0	0	0
X12	F2	12	0	0	0	0	0	0	0	0	0	0	0	0	0	0	0
X13	G2	13	0	0	0	0	0	0	0	0	0	0	0	0	0	0	0
X14	H2	14	0	0	0	0	0	0	0	0	0	0	0	0	0	0	0
X15	A3	15	0	0	0	0	0	0	0	0	0	0	0	0	0	0	0
X16	B3	16	0	0	0	0	0	0	0	0	0	0	0	0	0	0	0
X17	C3	17	0	0	0	0	0	0	0	0	0	0	0	0	0	0	0
X18	D3	18	0	0	0	0	0	0	0	0	0	0	0	0	0	0	0
X19	E3	19	0	0	0	0	0	0	0	0	0	0	0	0	0	0	0
X20	F3	bedas only	0	0	0	0	0	0	0	0	0	0	0	0	0	0	0
X21	G3	beads only	0	0	0	0	0	0	0	0	0	0	0	0	0	0	0
			HXT3 (13)	ACCO2 (26)	[ TFC1 (29) ]	HXT2 (30)	HXT4 (33)	LYS9 (37)	LYS12 (38)	[ PDA1 (39) ]	CTP1 (42)	EDS1 (45)	GUSA (47)	LYS4 (48)	RGT1 (51)	HXT1 (53)	[ UBC6 (56) ]
Type	Well	Description	Std Dev	Std Dev	Std Dev	Std Dev	Std Dev	Std Dev	Std Dev	Std Dev	Std Dev	Std Dev	Std Dev	Std Dev	Std Dev	Std Dev	Std Dev
B	A1
B	B1
X1	C1
X2	D1
X3	E1
X4	F1
X5	G1
X6	H1
X7	A2
X8	B2
X9	C2
X10	D2
X11	E2
X12	F2
X13	G2
X14	H2
X15	A3
X16	B3
X17	C3
X18	D3
X19	E3
X20	F3
X21	G3
Sampling Errors: 1 - Low bead #, 2 - Agg beads, 3 - Classify %, 4 - Region selection, 5 - Platform temperature
***Value not available / --- = Designated as an outlier
*Value extrapolated beyond standard range
OOR = Out of Range / OOR> = Out of Range Above / OOR< = Out of Range Below
Exp Conc = Expected Concentration / Obs Conc = Observed Concentration
Conc in Range = Unknown sample concentrations within range where standards recovery is 70-130%
Ratio = Member/Reference
Normalization Internal Control/Housekeeping Gene(s): TFC1 (29), PDA1 (39), and UBC6 (56)

## Sheet: Std Err
File Name: C:\Documents and Settings\apte\Desktop\Brent Lab\2013.1.18 EDS1.rbx
Acquisition Date: 18-Jan-2013, 02:44 PM
Reader Serial Number: LX10007281403
Plate ID: EDS1 2013.1.18
RP1 PMT (Volts): 565.08
RP1 Target: 3595
			HXT3 (13)	ACCO2 (26)	[ TFC1 (29) ]	HXT2 (30)	HXT4 (33)	LYS9 (37)	LYS12 (38)	[ PDA1 (39) ]	CTP1 (42)	EDS1 (45)	GUSA (47)	LYS4 (48)	RGT1 (51)	HXT1 (53)	[ UBC6 (56) ]
Type	Well	Description	Std Err	Std Err	Std Err	Std Err	Std Err	Std Err	Std Err	Std Err	Std Err	Std Err	Std Err	Std Err	Std Err	Std Err	Std Err
B	A1,B1		0.5	0.5	0	0	3.25	0	1	0.5	1.5	0	0.25	0	0.5	1	1
X1	C1	1	0	0	0	0	0	0	0	0	0	0	0	0	0	0	0
X2	D1	2	0	0	0	0	0	0	0	0	0	0	0	0	0	0	0
X3	E1	3	0	0	0	0	0	0	0	0	0	0	0	0	0	0	0
X4	F1	4	0	0	0	0	0	0	0	0	0	0	0	0	0	0	0
X5	G1	5	0	0	0	0	0	0	0	0	0	0	0	0	0	0	0
X6	H1	6	0	0	0	0	0	0	0	0	0	0	0	0	0	0	0
X7	A2	7	0	0	0	0	0	0	0	0	0	0	0	0	0	0	0
X8	B2	8	0	0	0	0	0	0	0	0	0	0	0	0	0	0	0
X9	C2	9	0	0	0	0	0	0	0	0	0	0	0	0	0	0	0
X10	D2	10	0	0	0	0	0	0	0	0	0	0	0	0	0	0	0
X11	E2	11	0	0	0	0	0	0	0	0	0	0	0	0	0	0	0
X12	F2	12	0	0	0	0	0	0	0	0	0	0	0	0	0	0	0
X13	G2	13	0	0	0	0	0	0	0	0	0	0	0	0	0	0	0
X14	H2	14	0	0	0	0	0	0	0	0	0	0	0	0	0	0	0
X15	A3	15	0	0	0	0	0	0	0	0	0	0	0	0	0	0	0
X16	B3	16	0	0	0	0	0	0	0	0	0	0	0	0	0	0	0
X17	C3	17	0	0	0	0	0	0	0	0	0	0	0	0	0	0	0
X18	D3	18	0	0	0	0	0	0	0	0	0	0	0	0	0	0	0
X19	E3	19	0	0	0	0	0	0	0	0	0	0	0	0	0	0	0
X20	F3	bedas only	0	0	0	0	0	0	0	0	0	0	0	0	0	0	0
X21	G3	beads only	0	0	0	0	0	0	0	0	0	0	0	0	0	0	0
			HXT3 (13)	ACCO2 (26)	[ TFC1 (29) ]	HXT2 (30)	HXT4 (33)	LYS9 (37)	LYS12 (38)	[ PDA1 (39) ]	CTP1 (42)	EDS1 (45)	GUSA (47)	LYS4 (48)	RGT1 (51)	HXT1 (53)	[ UBC6 (56) ]
Type	Well	Description	Std Err	Std Err	Std Err	Std Err	Std Err	Std Err	Std Err	Std Err	Std Err	Std Err	Std Err	Std Err	Std Err	Std Err	Std Err
B	A1
B	B1
X1	C1
X2	D1
X3	E1
X4	F1
X5	G1
X6	H1
X7	A2
X8	B2
X9	C2
X10	D2
X11	E2
X12	F2
X13	G2
X14	H2
X15	A3
X16	B3
X17	C3
X18	D3
X19	E3
X20	F3
X21	G3
Sampling Errors: 1 - Low bead #, 2 - Agg beads, 3 - Classify %, 4 - Region selection, 5 - Platform temperature
***Value not available / --- = Designated as an outlier
*Value extrapolated beyond standard range
OOR = Out of Range / OOR> = Out of Range Above / OOR< = Out of Range Below
Exp Conc = Expected Concentration / Obs Conc = Observed Concentration
Conc in Range = Unknown sample concentrations within range where standards recovery is 70-130%
Ratio = Member/Reference
Normalization Internal Control/Housekeeping Gene(s): TFC1 (29), PDA1 (39), and UBC6 (56)

## Sheet: %CV
File Name: C:\Documents and Settings\apte\Desktop\Brent Lab\2013.1.18 EDS1.rbx
Acquisition Date: 18-Jan-2013, 02:44 PM
Reader Serial Number: LX10007281403
Plate ID: EDS1 2013.1.18
RP1 PMT (Volts): 565.08
RP1 Target: 3595
			HXT3 (13)	ACCO2 (26)	[ TFC1 (29) ]	HXT2 (30)	HXT4 (33)	LYS9 (37)	LYS12 (38)	[ PDA1 (39) ]	CTP1 (42)	EDS1 (45)	GUSA (47)	LYS4 (48)	RGT1 (51)	HXT1 (53)	[ UBC6 (56) ]
Type	Well	Description	%CV	%CV	%CV	%CV	%CV	%CV	%CV	%CV	%CV	%CV	%CV	%CV	%CV	%CV	%CV
B	A1,B1		12.86	20.2	0	0	47.14	0	23.57	7.44	15.71	0	2.32	0	4.88	9.43	47.14
X1	C1	1	0	0	0	0	0	0	0	0	0	0	0	0	0	0	0
X2	D1	2	0	0	0	0	0	0	0	0	0	0	0	0	0	0	0
X3	E1	3	0	0	0	0	0	0	0	0	0	0	0	0	0	0	0
X4	F1	4	0	0	0	0	0	0	0	0	0	0	0	0	0	0	0
X5	G1	5	0	0	0	0	0	0	0	0	0	0	0	0	0	0	0
X6	H1	6	0	0	0	0	0	0	0	0	0	0	0	0	0	0	0
X7	A2	7	0	0	0	0	0	0	0	0	0	0	0	0	0	0	0
X8	B2	8	0	0	0	0	0	0	0	0	0	0	0	0	0	0	0
X9	C2	9	0	0	0	0	0	0	0	0	0	0	0	0	0	0	0
X10	D2	10	0	0	0	0	0	0	0	0	0	0	0	0	0	0	0
X11	E2	11	0	0	0	0	0	0	0	0	0	0	0	0	0	0	0
X12	F2	12	0	0	0	0	0	0	0	0	0	0	0	0	0	0	0
X13	G2	13	0	0	0	0	0	0	0	0	0	0	0	0	0	0	0
X14	H2	14	0	0	0	0	0	0	0	0	0	0	0	0	0	0	0
X15	A3	15	0	0	0	0	0	0	0	0	0	0	0	0	0	0	0
X16	B3	16	0	0	0	0	0	0	0	0	0	0	0	0	0	0	0
X17	C3	17	0	0	0	0	0	0	0	0	0	0	0	0	0	0	0
X18	D3	18	0	0	0	0	0	0	0	0	0	0	0	0	0	0	0
X19	E3	19	0	0	0	0	0	0	0	0	0	0	0	0	0	0	0
X20	F3	bedas only	0	0	0	0	0	0	0	0	0	0	0	0	0	0	0
X21	G3	beads only	0	0	0	0	0	0	0	0	0	0	0	0	0	0	0
			HXT3 (13)	ACCO2 (26)	[ TFC1 (29) ]	HXT2 (30)	HXT4 (33)	LYS9 (37)	LYS12 (38)	[ PDA1 (39) ]	CTP1 (42)	EDS1 (45)	GUSA (47)	LYS4 (48)	RGT1 (51)	HXT1 (53)	[ UBC6 (56) ]
Type	Well	Description	%CV	%CV	%CV	%CV	%CV	%CV	%CV	%CV	%CV	%CV	%CV	%CV	%CV	%CV	%CV
B	A1
B	B1
X1	C1
X2	D1
X3	E1
X4	F1
X5	G1
X6	H1
X7	A2
X8	B2
X9	C2
X10	D2
X11	E2
X12	F2
X13	G2
X14	H2
X15	A3
X16	B3
X17	C3
X18	D3
X19	E3
X20	F3
X21	G3
Sampling Errors: 1 - Low bead #, 2 - Agg beads, 3 - Classify %, 4 - Region selection, 5 - Platform temperature
***Value not available / --- = Designated as an outlier
*Value extrapolated beyond standard range
OOR = Out of Range / OOR> = Out of Range Above / OOR< = Out of Range Below
Exp Conc = Expected Concentration / Obs Conc = Observed Concentration
Conc in Range = Unknown sample concentrations within range where standards recovery is 70-130%
Ratio = Member/Reference
Normalization Internal Control/Housekeeping Gene(s): TFC1 (29), PDA1 (39), and UBC6 (56)

## Sheet: Norm Ratio
File Name: C:\Documents and Settings\apte\Desktop\Brent Lab\2013.1.18 EDS1.rbx
Acquisition Date: 18-Jan-2013, 02:44 PM
Reader Serial Number: LX10007281403
Plate ID: EDS1 2013.1.18
RP1 PMT (Volts): 565.08
RP1 Target: 3595
			HXT3 (13)	ACCO2 (26)	[ TFC1 (29) ]	HXT2 (30)	HXT4 (33)	LYS9 (37)	LYS12 (38)	[ PDA1 (39) ]	CTP1 (42)	EDS1 (45)	GUSA (47)	LYS4 (48)	RGT1 (51)	HXT1 (53)	[ UBC6 (56) ]
Type	Well	Description	Norm Ratio	Norm Ratio	Norm Ratio	Norm Ratio	Norm Ratio	Norm Ratio	Norm Ratio	Norm Ratio	Norm Ratio	Norm Ratio	Norm Ratio	Norm Ratio	Norm Ratio	Norm Ratio	Norm Ratio
B	A1,B1	Blank	1.097	0.677	0.985	0.591	1.837	2.956	1.156	1.859	2.621	0.788	3.012	0.591	2.871	2.93	0.565
X1	C1	BY4741-1 SC 2% glucose	4.594	0.432	0.149	0.451	4.445	1.073	1.854	4.561	0.182	0.012	0.006	0.511	0.377	4.272	1.474
X2	D1	BY4741-2 SC 2% glucose	4.157	0.432	0.165	0.499	3.941	0.999	1.898	3.968	0.176	0.016	0.004	0.523	0.367	3.81	1.531
X3	E1	Δeds1-1 (from KO collection) SC 2% glucose	4.123	1.464	0.14	1.147	0.657	3.773	3.822	4.766	0.489	0.003	0.009	1.65	0.325	3.677	1.496
X4	F1	Δeds1-2 (from KO collection) SC 2% glucose	4.221	1.404	0.137	1.12	0.554	3.628	3.932	4.878	0.457	0.001	0.006	1.671	0.28	3.639	1.5
X5	G1	MB425-1 (PtetO2) SC 2% glucose	4.534	0.56	0.15	0.338	0.573	1.266	2.163	4.772	0.156	3.758	0.006	0.612	0.318	4.072	1.401
X6	H1	MB425-2 (PtetO2) SC 2% glucose	3.886	0.399	0.167	0.768	3.841	1.195	2.177	3.778	0.168	3.733	0.008	0.44	0.417	3.778	1.589
X7	A2	MB426-1 (PtetO7) SC 2% glucose	3.132	0.333	0.188	0.932	3.188	1.097	1.916	3.218	0.168	3.37	0.007	0.425	0.419	0.737	1.655
X8	B2	MB426-2 (PtetO7) SC 2% glucose	3.867	0.306	0.162	0.945	3.97	1.032	1.82	4.017	0.164	4.332	0.004	0.393	0.394	0.662	1.54
X9	C2	MB431 (QKO Bio-rep 1) SC 2% glucose	6.946	0.554	0.122	6.674	7.286	1.332	3.414	5.378	0.236	0.002	0.23	1.027	0.005	0.432	1.52
X10	D2	MB432 (QKO Bio-rep 2) SC 2% glucose	4.826	0.251	0.149	4.506	4.901	0.528	1.479	4.52	0.16	0.001	0.184	0.385	0.003	1.44	1.48
X11	E2	MB425-1 (PtetO2) SC 2% glucose +0.1ug/ml Dox	4.807	0.445	0.162	0.847	4.181	1.027	1.965	4.682	0.155	0.344	0.005	0.52	0.374	3.542	1.322
X12	F2	MB425-2 (PtetO7) SC 2% glucose +0.1ug/ml Dox	4.375	0.369	0.161	0.663	4.273	0.919	1.906	4.274	0.161	1.956	0.005	0.418	0.394	3.426	1.457
X13	G2	BY4741 SC 2% galactose	4.889	0.458	0.155	0.45	3.771	1.201	2.042	4.906	0.156	0.013	0.004	0.665	0.38	4.899	1.319
X14	H2	Δeds1 (from KO collection) SC 2% galactose	6.224	0.995	0.115	1.342	1.265	3.434	3.615	6.089	0.409	0.001	0.008	1.352	0.304	4.718	1.427
X15	A3	MB425 (PtetO2) SC 2% galactose	3.564	0.377	0.186	0.931	3.53	0.942	1.974	3.453	0.157	3.048	0.007	0.442	0.48	3.475	1.555
X16	B3	MB426 (PtetO7) SC 2% galactose	3.319	0.279	0.182	0.524	3.383	0.87	1.749	3.382	0.158	3.607	0.006	0.383	0.397	0.807	1.627
X17	C3	MB431 (QKO) SC 2% galactose	5.658	0.488	0.123	5.428	5.833	1.24	2.957	5.374	0.189	0.002	0.201	0.86	0.005	1.083	1.515
X18	D3	MB425 (PtetO2) SC 2% galactose +0.1ug/ml Dox	4.756	0.371	0.155	0.807	4.748	0.946	2.043	4.829	0.146	0.334	0.008	0.457	0.403	4.095	1.333
X19	E3	MB426 (PtetO7) SC 2% galactose + 0.1ug/ml Dox	---	---	---	---	---	1	---	1	2.646	---	---	1.414	3.606	3.162	---
X20	F3	Beads only	---	1.061	0.707	2.828	---	---	0.707	---	---	0.707	---	4.243	---	---	1.414
X21	G3	Beads only	---	0.909	---	1.26	---	---	---	---	---	0.794	---	1.442	---	---	1
			HXT3 (13)	ACCO2 (26)	[ TFC1 (29) ]	HXT2 (30)	HXT4 (33)	LYS9 (37)	LYS12 (38)	[ PDA1 (39) ]	CTP1 (42)	EDS1 (45)	GUSA (47)	LYS4 (48)	RGT1 (51)	HXT1 (53)	[ UBC6 (56) ]
Type	Well	Description	Norm Ratio	Norm Ratio	Norm Ratio	Norm Ratio	Norm Ratio	Norm Ratio	Norm Ratio	Norm Ratio	Norm Ratio	Norm Ratio	Norm Ratio	Norm Ratio	Norm Ratio	Norm Ratio	Norm Ratio
B	A1	Blank	0.855	0.684	0.855	0.513	2.223	2.565	1.197	1.71	2.565	0.684	2.565	0.513	2.394	2.736	0.684
B	B1	Blank	1.339	0.669	1.116	0.669	1.45	3.347	1.116	2.008	2.678	0.893	3.459	0.669	3.347	3.124	0.446
X1	C1	BY4741-1 SC 2% glucose	4.594	0.432	0.149	0.451	4.445	1.073	1.854	4.561	0.182	0.012	0.006	0.511	0.377	4.272	1.474
X2	D1	BY4741-2 SC 2% glucose	4.157	0.432	0.165	0.499	3.941	0.999	1.898	3.968	0.176	0.016	0.004	0.523	0.367	3.81	1.531
X3	E1	Δeds1-1 (from KO collection) SC 2% glucose	4.123	1.464	0.14	1.147	0.657	3.773	3.822	4.766	0.489	0.003	0.009	1.65	0.325	3.677	1.496
X4	F1	Δeds1-2 (from KO collection) SC 2% glucose	4.221	1.404	0.137	1.12	0.554	3.628	3.932	4.878	0.457	0.001	0.006	1.671	0.28	3.639	1.5
X5	G1	MB425-1 (PtetO2) SC 2% glucose	4.534	0.56	0.15	0.338	0.573	1.266	2.163	4.772	0.156	3.758	0.006	0.612	0.318	4.072	1.401
X6	H1	MB425-2 (PtetO2) SC 2% glucose	3.886	0.399	0.167	0.768	3.841	1.195	2.177	3.778	0.168	3.733	0.008	0.44	0.417	3.778	1.589
X7	A2	MB426-1 (PtetO7) SC 2% glucose	3.132	0.333	0.188	0.932	3.188	1.097	1.916	3.218	0.168	3.37	0.007	0.425	0.419	0.737	1.655
X8	B2	MB426-2 (PtetO7) SC 2% glucose	3.867	0.306	0.162	0.945	3.97	1.032	1.82	4.017	0.164	4.332	0.004	0.393	0.394	0.662	1.54
X9	C2	MB431 (QKO Bio-rep 1) SC 2% glucose	6.946	0.554	0.122	6.674	7.286	1.332	3.414	5.378	0.236	0.002	0.23	1.027	0.005	0.432	1.52
X10	D2	MB432 (QKO Bio-rep 2) SC 2% glucose	4.826	0.251	0.149	4.506	4.901	0.528	1.479	4.52	0.16	0.001	0.184	0.385	0.003	1.44	1.48
X11	E2	MB425-1 (PtetO2) SC 2% glucose +0.1ug/ml Dox	4.807	0.445	0.162	0.847	4.181	1.027	1.965	4.682	0.155	0.344	0.005	0.52	0.374	3.542	1.322
X12	F2	MB425-2 (PtetO2) SC 2% glucose +0.1ug/ml Dox	4.375	0.369	0.161	0.663	4.273	0.919	1.906	4.274	0.161	1.956	0.005	0.418	0.394	3.426	1.457
X13	G2	BY4741 SC 2% galactose	4.889	0.458	0.155	0.45	3.771	1.201	2.042	4.906	0.156	0.013	0.004	0.665	0.38	4.899	1.319
X14	H2	Δeds1 (from KO collection) SC 2% galactose	6.224	0.995	0.115	1.342	1.265	3.434	3.615	6.089	0.409	0.001	0.008	1.352	0.304	4.718	1.427
X15	A3	MB425 (PtetO2) SC 2% galactose	3.564	0.377	0.186	0.931	3.53	0.942	1.974	3.453	0.157	3.048	0.007	0.442	0.48	3.475	1.555
X16	B3	MB426 (PtetO7) SC 2% galactose	3.319	0.279	0.182	0.524	3.383	0.87	1.749	3.382	0.158	3.607	0.006	0.383	0.397	0.807	1.627
X17	C3	MB431 (QKO) SC 2% galactose	5.658	0.488	0.123	5.428	5.833	1.24	2.957	5.374	0.189	0.002	0.201	0.86	0.005	1.083	1.515
X18	D3	MB425 (PtetO2) SC 2% galactose +0.1ug/ml Dox	4.756	0.371	0.155	0.807	4.748	0.946	2.043	4.829	0.146	0.334	0.008	0.457	0.403	4.095	1.333
X19	E3	MB426 (PtetO7) SC 2% galactose + 0.1ug/ml Dox	---	---	---	---	---	1	---	1	2.646	---	---	1.414	3.606	3.162	---
X20	F3	Beads only	---	1.061	0.707	2.828	---	---	0.707	---	---	0.707	---	4.243	---	---	1.414
X21	G3	Beads only	---	0.909	---	1.26	---	---	---	---	---	0.794	---	1.442	---	---	1
Sampling Errors: 1 - Low bead #, 2 - Agg beads, 3 - Classify %, 4 - Region selection, 5 - Platform temperature
***Value not available / --- = Designated as an outlier
*Value extrapolated beyond standard range
OOR = Out of Range / OOR> = Out of Range Above / OOR< = Out of Range Below
Exp Conc = Expected Concentration / Obs Conc = Observed Concentration
Conc in Range = Unknown sample concentrations within range where standards recovery is 70-130%
Ratio = Member/Reference
Normalization Internal Control/Housekeeping Gene(s): TFC1 (29), PDA1 (39), and UBC6 (56)

## Sheet: Norm Ratio Std Dev
File Name: C:\Documents and Settings\apte\Desktop\Brent Lab\2013.1.18 EDS1.rbx
Acquisition Date: 18-Jan-2013, 02:44 PM
Reader Serial Number: LX10007281403
Plate ID: EDS1 2013.1.18
RP1 PMT (Volts): 565.08
RP1 Target: 3595
			HXT3 (13)	ACCO2 (26)	[ TFC1 (29) ]	HXT2 (30)	HXT4 (33)	LYS9 (37)	LYS12 (38)	[ PDA1 (39) ]	CTP1 (42)	EDS1 (45)	GUSA (47)	LYS4 (48)	RGT1 (51)	HXT1 (53)	[ UBC6 (56) ]
Type	Well	Description	Norm Ratio Std Dev	Norm Ratio Std Dev	Norm Ratio Std Dev	Norm Ratio Std Dev	Norm Ratio Std Dev	Norm Ratio Std Dev	Norm Ratio Std Dev	Norm Ratio Std Dev	Norm Ratio Std Dev	Norm Ratio Std Dev	Norm Ratio Std Dev	Norm Ratio Std Dev	Norm Ratio Std Dev	Norm Ratio Std Dev	Norm Ratio Std Dev
B	A1,B1		0.34	0.01	0.18	0.11	0.55	0.55	0.06	0.21	0.08	0.15	0.63	0.11	0.67	0.27	0.17
X1	C1	1	0	0	0	0	0	0	0	0	0	0	0	0	0	0	0
X2	D1	2	0	0	0	0	0	0	0	0	0	0	0	0	0	0	0
X3	E1	3	0	0	0	0	0	0	0	0	0	0	0	0	0	0	0
X4	F1	4	0	0	0	0	0	0	0	0	0	0	0	0	0	0	0
X5	G1	5	0	0	0	0	0	0	0	0	0	0	0	0	0	0	0
X6	H1	6	0	0	0	0	0	0	0	0	0	0	0	0	0	0	0
X7	A2	7	0	0	0	0	0	0	0	0	0	0	0	0	0	0	0
X8	B2	8	0	0	0	0	0	0	0	0	0	0	0	0	0	0	0
X9	C2	9	0	0	0	0	0	0	0	0	0	0	0	0	0	0	0
X10	D2	10	0	0	0	0	0	0	0	0	0	0	0	0	0	0	0
X11	E2	11	0	0	0	0	0	0	0	0	0	0	0	0	0	0	0
X12	F2	12	0	0	0	0	0	0	0	0	0	0	0	0	0	0	0
X13	G2	13	0	0	0	0	0	0	0	0	0	0	0	0	0	0	0
X14	H2	14	0	0	0	0	0	0	0	0	0	0	0	0	0	0	0
X15	A3	15	0	0	0	0	0	0	0	0	0	0	0	0	0	0	0
X16	B3	16	0	0	0	0	0	0	0	0	0	0	0	0	0	0	0
X17	C3	17	0	0	0	0	0	0	0	0	0	0	0	0	0	0	0
X18	D3	18	0	0	0	0	0	0	0	0	0	0	0	0	0	0	0
X19	E3	19						0		0	0			0	0	0
X20	F3	bedas only		0	0	0			0			0		0			0
X21	G3	beads only		0		0						0		0			0
			HXT3 (13)	ACCO2 (26)	[ TFC1 (29) ]	HXT2 (30)	HXT4 (33)	LYS9 (37)	LYS12 (38)	[ PDA1 (39) ]	CTP1 (42)	EDS1 (45)	GUSA (47)	LYS4 (48)	RGT1 (51)	HXT1 (53)	[ UBC6 (56) ]
Type	Well	Description	Norm Ratio Std Dev	Norm Ratio Std Dev	Norm Ratio Std Dev	Norm Ratio Std Dev	Norm Ratio Std Dev	Norm Ratio Std Dev	Norm Ratio Std Dev	Norm Ratio Std Dev	Norm Ratio Std Dev	Norm Ratio Std Dev	Norm Ratio Std Dev	Norm Ratio Std Dev	Norm Ratio Std Dev	Norm Ratio Std Dev	Norm Ratio Std Dev
B	A1
B	B1
X1	C1
X2	D1
X3	E1
X4	F1
X5	G1
X6	H1
X7	A2
X8	B2
X9	C2
X10	D2
X11	E2
X12	F2
X13	G2
X14	H2
X15	A3
X16	B3
X17	C3
X18	D3
X19	E3
X20	F3
X21	G3
Sampling Errors: 1 - Low bead #, 2 - Agg beads, 3 - Classify %, 4 - Region selection, 5 - Platform temperature
***Value not available / --- = Designated as an outlier
*Value extrapolated beyond standard range
OOR = Out of Range / OOR> = Out of Range Above / OOR< = Out of Range Below
Exp Conc = Expected Concentration / Obs Conc = Observed Concentration
Conc in Range = Unknown sample concentrations within range where standards recovery is 70-130%
Ratio = Member/Reference
Normalization Internal Control/Housekeeping Gene(s): TFC1 (29), PDA1 (39), and UBC6 (56)

## Sheet: Norm Ratio Std Err
File Name: C:\Documents and Settings\apte\Desktop\Brent Lab\2013.1.18 EDS1.rbx
Acquisition Date: 18-Jan-2013, 02:44 PM
Reader Serial Number: LX10007281403
Plate ID: EDS1 2013.1.18
RP1 PMT (Volts): 565.08
RP1 Target: 3595
			HXT3 (13)	ACCO2 (26)	[ TFC1 (29) ]	HXT2 (30)	HXT4 (33)	LYS9 (37)	LYS12 (38)	[ PDA1 (39) ]	CTP1 (42)	EDS1 (45)	GUSA (47)	LYS4 (48)	RGT1 (51)	HXT1 (53)	[ UBC6 (56) ]
Type	Well	Description	Norm Ratio Std Err	Norm Ratio Std Err	Norm Ratio Std Err	Norm Ratio Std Err	Norm Ratio Std Err	Norm Ratio Std Err	Norm Ratio Std Err	Norm Ratio Std Err	Norm Ratio Std Err	Norm Ratio Std Err	Norm Ratio Std Err	Norm Ratio Std Err	Norm Ratio Std Err	Norm Ratio Std Err	Norm Ratio Std Err
B	A1,B1		0.24	0.01	0.13	0.08	0.39	0.39	0.04	0.15	0.06	0.1	0.45	0.08	0.48	0.19	0.12
X1	C1	1	0	0	0	0	0	0	0	0	0	0	0	0	0	0	0
X2	D1	2	0	0	0	0	0	0	0	0	0	0	0	0	0	0	0
X3	E1	3	0	0	0	0	0	0	0	0	0	0	0	0	0	0	0
X4	F1	4	0	0	0	0	0	0	0	0	0	0	0	0	0	0	0
X5	G1	5	0	0	0	0	0	0	0	0	0	0	0	0	0	0	0
X6	H1	6	0	0	0	0	0	0	0	0	0	0	0	0	0	0	0
X7	A2	7	0	0	0	0	0	0	0	0	0	0	0	0	0	0	0
X8	B2	8	0	0	0	0	0	0	0	0	0	0	0	0	0	0	0
X9	C2	9	0	0	0	0	0	0	0	0	0	0	0	0	0	0	0
X10	D2	10	0	0	0	0	0	0	0	0	0	0	0	0	0	0	0
X11	E2	11	0	0	0	0	0	0	0	0	0	0	0	0	0	0	0
X12	F2	12	0	0	0	0	0	0	0	0	0	0	0	0	0	0	0
X13	G2	13	0	0	0	0	0	0	0	0	0	0	0	0	0	0	0
X14	H2	14	0	0	0	0	0	0	0	0	0	0	0	0	0	0	0
X15	A3	15	0	0	0	0	0	0	0	0	0	0	0	0	0	0	0
X16	B3	16	0	0	0	0	0	0	0	0	0	0	0	0	0	0	0
X17	C3	17	0	0	0	0	0	0	0	0	0	0	0	0	0	0	0
X18	D3	18	0	0	0	0	0	0	0	0	0	0	0	0	0	0	0
X19	E3	19						0		0	0			0	0	0
X20	F3	bedas only		0	0	0			0			0		0			0
X21	G3	beads only		0		0						0		0			0
			HXT3 (13)	ACCO2 (26)	[ TFC1 (29) ]	HXT2 (30)	HXT4 (33)	LYS9 (37)	LYS12 (38)	[ PDA1 (39) ]	CTP1 (42)	EDS1 (45)	GUSA (47)	LYS4 (48)	RGT1 (51)	HXT1 (53)	[ UBC6 (56) ]
Type	Well	Description	Norm Ratio Std Err	Norm Ratio Std Err	Norm Ratio Std Err	Norm Ratio Std Err	Norm Ratio Std Err	Norm Ratio Std Err	Norm Ratio Std Err	Norm Ratio Std Err	Norm Ratio Std Err	Norm Ratio Std Err	Norm Ratio Std Err	Norm Ratio Std Err	Norm Ratio Std Err	Norm Ratio Std Err	Norm Ratio Std Err
B	A1
B	B1
X1	C1
X2	D1
X3	E1
X4	F1
X5	G1
X6	H1
X7	A2
X8	B2
X9	C2
X10	D2
X11	E2
X12	F2
X13	G2
X14	H2
X15	A3
X16	B3
X17	C3
X18	D3
X19	E3
X20	F3
X21	G3
Sampling Errors: 1 - Low bead #, 2 - Agg beads, 3 - Classify %, 4 - Region selection, 5 - Platform temperature
***Value not available / --- = Designated as an outlier
*Value extrapolated beyond standard range
OOR = Out of Range / OOR> = Out of Range Above / OOR< = Out of Range Below
Exp Conc = Expected Concentration / Obs Conc = Observed Concentration
Conc in Range = Unknown sample concentrations within range where standards recovery is 70-130%
Ratio = Member/Reference
Normalization Internal Control/Housekeeping Gene(s): TFC1 (29), PDA1 (39), and UBC6 (56)

[truncated: 25 more sheets: Norm Ratio %CV, Norm FI, Norm FI Std Dev, Norm FI Std Err, Norm FI %CV, Obs Conc, Obs Conc Std Dev, Obs Conc Std Err, Obs Conc %CV, Exp Conc, (Obs Exp) X 100, Conc in Range, Group, Ratio, Dilution, Bead Count, Bead Mean, Bead Std Dev, Bead Std Err, Bead %CV …]
