# Supplementary material for: Mapping functional transcription factor networks from gene expression data
Source: HighWire-hosted journal article supplement (doi:10.1101/gr.150904.112), 2013-05-01
Supplement: Supp_Table_S3.docx [file Supp_Table_S3.docx]

Table S3. TF functions predicted by NetProphet and supported by non-ChIP data but not predicted by existing ChIP data. NP: number of targets predicted by NetProphet; GO: number of yeast genes in the indicated Gene Ontology (GO) Biological Process category; Overlap: Number of genes in both the NetProphet target set and the GO category; p-val: probability of such a large overlap occurring by chance; Description: description of the GO category.

| **Name** | **NP #** | **Go #** | **Overlap** | **Pvalue** |  | **Description** |
| --- | --- | --- | --- | --- | --- | --- |
| GCR2 | 89 | 60 | 17 | 1.E-17 |  | hexose catabolic process1 |
| DIG1 | 39 | 98 | 12 | 1.E-12 |  | response to pheromone2 |
| SDS3 | 61 | 98 | 13 | 2.E-11 |  | response to pheromone3 |
| OTU1 | 21 | 207 | 10 | 1.E-09 |  | proteolysis4 |
| OPI1 | 32 | 85 | 8 | 2.E-08 |  | phospholipid biosynthetic process5 |
| PHO2 | 67 | 10 | 5 | 5.E-08 |  | polyphosphate metabolic process6 |
| SFP1 | 350 | 34 | 13 | 6.E-08 |  | glycolysis7 |
| GCR1 | 146 | 60 | 11 | 3.E-07 |  | hexose catabolic process8 |
| HST1 | 49 | 109 | 9 | 3.E-07 |  | sexual sporulation9 |
| MGA2 | 121 | 712 | 35 | 2.E-06 |  | response to stress10 |
| RAP1 | 210 | 69 | 12 | 2.E-06 |  | ribosome biogenesis11 |
| SIR1 | 14 | 98 | 5 | 3.E-06 |  | response to pheromone12 |
| TUP1 | 415 | 712 | 85 | 4.E-06 |  | response to stress13 |
| TIS11 | 10 | 23 | 3 | 7.E-06 |  | iron ion transport14 |
| SIR2 | 102 | 98 | 10 | 1.E-05 |  | response to pheromone15 |
| RSC1 | 48 | 134 | 8 | 2.E-05 |  | fungal-type cell wall organization16 |
| SIR3 | 30 | 98 | 5 | 2.E-04 |  | response to pheromone17 |
| MCM1 | 146 | 81 | 9 | 2.E-04 |  | cellular response to oxidative stress18 |
| TUP1 | 415 | 25 | 8 | 3.E-04 |  | hexose transport19 |
| SPT10 | 174 | 219 | 17 | 5.E-04 |  | sexual reproduction20 |
| SUM1 | 80 | 3 | 2 | 6.E-04 |  | spore membrane bending pathway21 |
| MOT3 | 31 | 712 | 11 | 1.E-03 |  | response to stress22 |
| MSN2 | 14 | 533 | 6 | 1.E-03 |  | cellular response to stress23 |
| TYE7 | 20 | 235 | 5 | 1.E-03 |  | alcohol metabolic process24 |
| YAP1 | 18 | 638 | 7 | 1.E-03 |  | response to stress25 |
| PHO2 | 67 | 83 | 5 | 3.E-03 |  | dephosphorylation26 |
| ACE2 | 24 | 362 | 6 | 4.E-03 |  | M phase27 |
| ISW2 | 45 | 14 | 2 | 6.E-03 |  | ascospore-type prospore formation28 |
| CBF1 | 49 | 83 | 4 | 6.E-03 |  | dephosphorylation29 |

1([Clifton & Fraenkel, 1981](#_ENREF_4))

2([Tedford, Kim, Sa, Stevens, & Tyers, 1997](#_ENREF_22))

3([Narayanaswamy et al., 2006](#_ENREF_11))

4([Rumpf & Jentsch, 2006](#_ENREF_18))

5([Sreenivas & Carman, 2003](#_ENREF_20))

6([Ogawa, DeRisi, & Brown, 2000](#_ENREF_13))

7([Cipollina et al., 2008](#_ENREF_3))

8([Clifton, Weinstock, & Fraenkel, 1978](#_ENREF_5))

9([Xie et al., 1999](#_ENREF_26))

10([Jiang et al., 2001](#_ENREF_7))

11([Lieb, Liu, Botstein, & Brown, 2001](#_ENREF_8))

12([Rine, Strathern, Hicks, & Herskowitz, 1979](#_ENREF_17))

13([Proft et al., 2001](#_ENREF_14))

14([Puig, Askeland, & Thiele, 2005](#_ENREF_15))

15([Rine, et al., 1979](#_ENREF_17))

16([Bungard, Reed, & Winter, 2004](#_ENREF_1))

17([Rine & Herskowitz, 1987](#_ENREF_16))

18([Shapira, Segal, & Botstein, 2004](#_ENREF_19))

19([Treitel & Carlson, 1995](#_ENREF_24))

20([Chang & Winston, 2011](#_ENREF_2))

21([Xie, et al., 1999](#_ENREF_26))

22([Montanes, Pascual-Ahuir, & Proft, 2011](#_ENREF_10))

23([Martinez-Pastor et al., 1996](#_ENREF_9))

24([Nishi et al., 1995](#_ENREF_12))

25([Wu et al., 1993](#_ENREF_25))

26([Tamai, Toh-e, & Oshima, 1985](#_ENREF_21))

27([Dohrmann et al., 1992](#_ENREF_6))

28([Trachtulcova, Janatova, Kohlwein, & Hasek, 2000](#_ENREF_23))

29([Zhou & O'Shea, 2011](#_ENREF_27))

REFERENCES

Bungard, D, Reed, M, & Winter, E. (2004). RSC1 and RSC2 are required for expression of mid-late sporulation-specific genes in Saccharomyces cerevisiae. *Eukaryot Cell,* ***3***(4), 910-918. doi: 10.1128/EC.3.4.910-918.2004

Chang, JS, & Winston, F. (2011). Spt10 and Spt21 are required for transcriptional silencing in Saccharomyces cerevisiae. *Eukaryot Cell,* ***10***(1), 118-129. doi: 10.1128/EC.00246-10

Cipollina, C, van den Brink, J, Daran-Lapujade, P, Pronk, JT, Porro, D, & de Winde, JH. (2008). Saccharomyces cerevisiae SFP1: at the crossroads of central metabolism and ribosome biogenesis. *Microbiology,* ***154***(Pt 6), 1686-1699. doi: 10.1099/mic.0.2008/017392-0

Clifton, D, & Fraenkel, DG. (1981). The gcr (glycolysis regulation) mutation of Saccharomyces cerevisiae. *The Journal of biological chemistry,* ***256***(24), 13074-13078.

Clifton, D, Weinstock, SB, & Fraenkel, DG. (1978). Glycolysis mutants in Saccharomyces cerevisiae. *Genetics,* ***88***(1), 1-11.

Dohrmann, PR, Butler, G, Tamai, K, Dorland, S, Greene, JR, Thiele, DJ, & Stillman, DJ. (1992). Parallel pathways of gene regulation: homologous regulators SWI5 and ACE2 differentially control transcription of HO and chitinase. *Genes & Development,* ***6***(1), 93-104.

Jiang, Y, Vasconcelles, MJ, Wretzel, S, Light, A, Martin, CE, & Goldberg, MA. (2001). MGA2 is involved in the low-oxygen response element-dependent hypoxic induction of genes in Saccharomyces cerevisiae. *Molecular and cellular biology,* ***21***(18), 6161-6169.

Lieb, JD, Liu, X, Botstein, D, & Brown, PO. (2001). Promoter-specific binding of Rap1 revealed by genome-wide maps of protein-DNA association. *Nat Genet,* ***28***(4), 327-334.

Martinez-Pastor, MT, Marchler, G, Schuller, C, Marchler-Bauer, A, Ruis, H, & Estruch, F. (1996). The Saccharomyces cerevisiae zinc finger proteins Msn2p and Msn4p are required for transcriptional induction through the stress response element (STRE). *The EMBO journal,* ***15***(9), 2227-2235.

Montanes, FM, Pascual-Ahuir, A, & Proft, M. (2011). Repression of ergosterol biosynthesis is essential for stress resistance and is mediated by the Hog1 MAP kinase and the Mot3 and Rox1 transcription factors. *Molecular microbiology,* ***79***(4), 1008-1023. doi: 10.1111/j.1365-2958.2010.07502.x

Narayanaswamy, R, Niu, W, Scouras, AD, Hart, GT, Davies, J, Ellington, AD, Iyer, VR, & Marcotte, EM. (2006). Systematic profiling of cellular phenotypes with spotted cell microarrays reveals mating-pheromone response genes. *Genome Biology,* ***7***(1), R6. doi: 10.1186/gb-2006-7-1-r6

Nishi, K, Park, CS, Pepper, AE, Eichinger, G, Innis, MA, & Holland, MJ. (1995). The GCR1 requirement for yeast glycolytic gene expression is suppressed by dominant mutations in the SGC1 gene, which encodes a novel basic-helix-loop-helix protein. *Molecular and cellular biology,* ***15***(5), 2646-2653.

Ogawa, N, DeRisi, J, & Brown, PO. (2000). New components of a system for phosphate accumulation and polyphosphate metabolism in Saccharomyces cerevisiae revealed by genomic expression analysis. *Molecular biology of the cell,* ***11***(12), 4309-4321.

Proft, M, Pascual-Ahuir, A, de Nadal, E, Arino, J, Serrano, R, & Posas, F. (2001). Regulation of the Sko1 transcriptional repressor by the Hog1 MAP kinase in response to osmotic stress. *The EMBO journal,* ***20***(5), 1123-1133. doi: 10.1093/emboj/20.5.1123

Puig, S, Askeland, E, & Thiele, DJ. (2005). Coordinated remodeling of cellular metabolism during iron deficiency through targeted mRNA degradation. *Cell,* ***120***(1), 99-110. doi: 10.1016/j.cell.2004.11.032

Rine, J, & Herskowitz, I. (1987). Four genes responsible for a position effect on expression from HML and HMR in Saccharomyces cerevisiae. *Genetics,* ***116***(1), 9-22.

Rine, J, Strathern, JN, Hicks, JB, & Herskowitz, I. (1979). A suppressor of mating-type locus mutations in Saccharomyces cerevisiae: evidence for and identification of cryptic mating-type loci. *Genetics,* ***93***(4), 877-901.

Rumpf, S, & Jentsch, S. (2006). Functional division of substrate processing cofactors of the ubiquitin-selective Cdc48 chaperone. *Molecular cell,* ***21***(2), 261-269. doi: 10.1016/j.molcel.2005.12.014

Shapira, M, Segal, E, & Botstein, D. (2004). Disruption of yeast forkhead-associated cell cycle transcription by oxidative stress. *Molecular biology of the cell,* ***15***(12), 5659-5669. doi: 10.1091/mbc.E04-04-0340

Sreenivas, A, & Carman, GM. (2003). Phosphorylation of the yeast phospholipid synthesis regulatory protein Opi1p by protein kinase A. *The Journal of biological chemistry,* ***278***(23), 20673-20680. doi: 10.1074/jbc.M300132200

Tamai, Y, Toh-e, A, & Oshima, Y. (1985). Regulation of inorganic phosphate transport systems in Saccharomyces cerevisiae. *Journal of bacteriology,* ***164***(2), 964-968.

Tedford, K, Kim, S, Sa, D, Stevens, K, & Tyers, M. (1997). Regulation of the mating pheromone and invasive growth responses in yeast by two MAP kinase substrates. *Current biology : CB,* ***7***(4), 228-238.

Trachtulcova, P, Janatova, I, Kohlwein, SD, & Hasek, J. (2000). Saccharomyces cerevisiae gene ISW2 encodes a microtubule-interacting protein required for premeiotic DNA replication. *Yeast,* ***16***(1), 35-47. doi: 10.1002/(SICI)1097-0061(20000115)16:1<35::AID-YEA504>3.0.CO;2-0

Treitel, MA, & Carlson, M. (1995). Repression by SSN6-TUP1 is directed by MIG1, a repressor/activator protein. *Proc Natl Acad Sci U S A,* ***92***(8), 3132-3136.

Wu, A, Wemmie, JA, Edgington, NP, Goebl, M, Guevara, JL, & Moye-Rowley, WS. (1993). Yeast bZip proteins mediate pleiotropic drug and metal resistance. *The Journal of biological chemistry,* ***268***(25), 18850-18858.

Xie, J, Pierce, M, Gailus-Durner, V, Wagner, M, Winter, E, & Vershon, AK. (1999). Sum1 and Hst1 repress middle sporulation-specific gene expression during mitosis in Saccharomyces cerevisiae. *The EMBO journal,* ***18***(22), 6448-6454. doi: 10.1093/emboj/18.22.6448

Zhou, X, & O'Shea, EK. (2011). Integrated approaches reveal determinants of genome-wide binding and function of the transcription factor Pho4. *Molecular cell,* ***42***(6), 826-836. doi: 10.1016/j.molcel.2011.05.025
